# Supplementary material
Source: PubMed Central journal article supplement (PMC3273364)
Supplement: peds.2010-2739_peds.2010-2739SupplementaryData.pdf [file peds.2010-2739_peds.2010-2739SupplementaryData.pdf]

## Supplemental Information

### DESCRIPTION OF THE EBV PCR USED

DNA was extracted from 200  $\mu$ L of whole blood with a QIAamp DNA blood mini kit. Epstein Barr DNA was amplified with an in-house real-time polymerase chain reaction (PCR) method targeting the *EBNA-1* gene. The sequences of the forward primer, the reverse primer, and the probe were 5'-GAC TGT GTG CAG CTT TGA CGAT-3', 5'-CAG CCC CTT CCA CCA TAG GT-3', and 5' CCT CCC TGG TTT ML -3', respectively. The probe was labeled at the 5' end with 6-carboxyfluorescein (FAM) and at the 3' end with Minor Groove Binder (MGB) (Applera, Courtaboeuf, France). The threshold value of the PCR test was 500 copies/mL.

### METHODS

This systematic review was carried out in accordance with Centre for Reviews and Dissemination guidelines for systematic reviews.<sup>1</sup>

### DATA SOURCE

We carried out a thorough search of Medline and Isi Web of Knowledge databases, from their inception to January 2010, for all clinical reports (case reports, case series, cohort studies, trials) of children presenting multicentric Castleman disease. The search strategy was based on the use of medical subject heading (MeSH) terms and free text words, including the following: "child," "infant," "children,"

"preschool child," "adolescent," "Castleman disease," and "giant lymph node hyperplasia." The electronic search was enhanced by hand-searching of the reference lists of all the articles identified, and all appropriate articles identified in this manner were subsequently obtained. The electronic search was validated by comparing the list obtained with the reference lists of previous reviews on Castleman disease (mono- or multicentric form, adults, children, or both together)<sup>2-5</sup> to identify any systematic defects that might be present. No language restriction was used. One reviewer (SL) screened the titles and abstracts from the electronic searches against the inclusion and exclusion criteria and considered for inclusion reports of children with multicentric Castleman disease. If insufficient information was available to make a decision, the full article was read and, in some cases, discussed with a second reviewer (SP) until a consensus was reached.

### STUDY ELIGIBILITY

We included all reports meeting the following criteria: children with multicentric Castleman disease. Children were considered to be under 18 years of age, and multicentric Castleman disease was defined on the basis of typical histological findings (hyaline vascular type, plasma cell type, or mixed type) in patients presenting disease at more

than 1 site (including nodal involvement and hepatosplenomegaly), with constitutional symptoms and/or immune and hematologic abnormalities.<sup>5</sup> Duplicate reports were excluded, and the analysis was restricted to pediatric patients. No limitations relating to study design were applied.

### DATA EXTRACTION

One reviewer (SL) abstracted the data from each study to obtain information about the year of publication, the type of study, the number of patients reported, their geographic origin if known, their age, gender, disease presentation and course, treatment, histologic findings, testing for viral infection if any, and any other relevant information relating to the patient. The reviewer (SL) extracted the data and completed a standardized electronic spreadsheet. All uncertainties were discussed with a second reviewer (SP) until a consensus was reached. Where necessary, the authors were contacted to obtain additional data or to clarify the information presented.

### ANALYSIS

We described the studies included, the characteristics of the children presenting multicentric Castleman disease, and the histological and viral characteristics of the various cases reported. Statistical analyses were carried out with Stata/SE 10 software (StataCorp, College Station, TX).

### REFERENCES

1. Centre for Reviews and Dissemination. *Systematic Reviews: CRD's Guidance for Undertaking Reviews in Health Care*. Heslington, United Kingdom: York Publishing Services Ltd; 2009
2. Parez N, Bader-Meunier B, Roy CC, Dommergues JP. Paediatric Castleman disease: report of seven cases and review of the literature. *Eur J Pediatr*. 1999;158(8):631-637
3. Salisbury JR. Castleman's disease in childhood and adolescence: report of a case and review of literature. *Pediatr Pathol*. 1990;10:609-615.

4. Bowne WB, Lewis JJ, Filippa DA, Niesvizky R, Brooks AD, Burt ME, Brennan MF et al. The management of unicentric and multicentric Castleman's disease: a report of 16 cases and a review of the literature. *Cancer*. 1999; 85(3):706–717
5. McClain KL, Natkunam Y, Swerdlow SH. Atypical cellular disorders. *Hematology Am Soc Hematol Educ Program*. 2004;283–296

## ARTICLES INCLUDED IN THE SYSTEMATIC REVIEW

1. Lee SL, Rosner F, Rivero I, Feldman F, Hurwitz A. Refractory anemia with abnormal iron metabolism: its remission after resection of hyperplastic mediastinal lymph nodes. *N Engl J Med*. 1965;272:761–766
2. Carrington PA, Walsh SE, Houghton JB. Benign paraproteinaemia and immune neutropenia. *Clin Lab Haematol*. 1989;11(4): 407–408
3. Said R, Tarawneh M. Membranoproliferative glomerulonephritis associated with multicentric angiofollicular lymph node hyperplasia. Case report and review of the literature. *Am J Nephrol*. 1992;12(6):466–470
4. O'Reilly PE, Jr, Joshi VV, Holbrook CT, Weisenburger DD. Multicentric Castleman's disease in a child with prominent thymic involvement: a case report and brief review of the literature. *Mod Pathol*. 1993;6(6):776–780
5. Kinney MC, Hummell DS, Villiger PM, Hourigan A, Rollins-Smith L, Glick AD, Lawton AR. Increased interleukin-6 (IL-6) production in a young child with clinical and pathologic features of multicentric Castleman's disease. *J Clin Immunol*. 1994;14(6):382–390
6. Taylor KL, Kaschula ROC. Castleman's disease in children: the experience of a children's hospital in Africa. *Pediatr Pathol Lab Med*. 1995;15(6):857–868
7. Vergin C, Cetingul N, Kavakli K, Oztop S, Ozkinay F, Coker M, et al. A patient with WT syndrome and Castleman disease. *Acta Paediatr Jpn* 1995;37:108–112.
8. Smir BN, Greiner TC, Weisenburger DD. Multicentric angiofollicular lymph node hyperplasia in children: a clinicopathologic study of eight patients. *Mod Pathol*. 1996;9(12):1135–1142
9. Arslan D, Oztürk F, Patiroğlu T, Küçükaydin M, Gündüz Z. Castleman's disease. A case report. *Turk J Pediatr*. 1996;38(3):361–366
10. Nakamura T, Sato K, Harada N, Sakuramoto M, Miyahara R, Maekawa T, Fukuda S. [Plasma cell interstitial pneumonia as a manifestation of multicentric Castleman's disease]. *Nihon Kyobu Shikkan Gakkai Zasshi*. 1997;35(7):776–783
11. Akyüz C, Kale G, Emir S, Akçören Z, Büyükpamukçu M. T-cell lymphoma in a child with multicentric Castleman disease. *Med Pediatr Oncol*. 2000;35(2):133–134
12. Koşucu P, Ahmetoğlu A, Imamoğlu M, Cay A, Cobanoğlu U, Gümele HR. Multicentric Castleman's disease in a child with subpectoral involvement. *Pediatr Radiol*. 2003;33(8):570–573
13. Baserga M, Rosin M, Schoen M, Young G. Multifocal Castleman disease in pediatrics: case report. *J Pediatr Hematol Oncol*. 2005;27(12):666–669
14. Zakiullah M, Khan Z, Qureshi R, Muzaffar S. Castleman's disease—a rare disease of lymph nodes. *J Coll Physicians Surg Pak*. 2006;16(1):74–75
15. Robinson H, Prince M, Ramdave S, Seymour JF, Elliott P, Hicks R. Preliminary experience of <sup>18</sup>F-fluorodeoxyglucose positron emission tomography in Castleman's disease. *Leuk Lymphoma*. 2006;47:2664–2666
16. Vasudev Rao T, Alkindi S, Pathare AV. Follicular dendritic cell hyperplasia in plasma cell variant of Castleman's disease with interfollicular Hodgkin's disease. *Pathol Res Pract*. 2007;203(6):479–484
17. Sharma R, Seth R, Thavaraj V, et al. Multicentric Castleman's disease in two cases. *Indian J Pediatr*. 2007;74(12):1116–1120
18. Lee J, Ban JY, Won KY, et al. Expression of EGFR and follicular dendritic markers in lymphoid follicles from patients with Castleman's disease. *Oncol Rep*. 2008;20(4): 851–856
19. Galeotti C, Tran TA, Franchi-Abella S, Fabre M, Pariente D, Koné-Paut I. IL-1RA agonist (anakinra) in the treatment of multifocal castleman disease: case report. *J Pediatr Hematol Oncol*. 2008;30(12):920–924
20. Sobrevilla-Calvo PJ, Avilés-Salas A, Cortés-Padilla DE, Rivas-Vera S. [Clinical and pathological features of Castleman's disease: experience at the Instituto Nacional de Cancerología, Mexico City]. *Cir Cir*. 2009;77: 187–192
21. Shohat B, Cohen I, Fogel R, Zaizov R. Suppressor mononuclear cells in giant lymph node hyperplasia and thymoma. *Cancer*. 1981;48(4):923–926
22. Simko R, Nagy K, Lombay B, et al. Multicentric Castleman disease and systemic lupus erythematosus phenotype in a boy with Klinefelter syndrome: long-term disease stabilization with interferon therapy. *J Pediatr Hematol Oncol*. 2000;22(2):180–183

**SUPPLEMENTAL TABLE 2** Systematic Review of Clinical Reports of Pediatric Patients with Multicentric Castlemans Disease and No Immunodeficiency

| Article                       | Author Location            | Patient Origin <sup>a</sup>                   | Gender | Age | Clinical Features                                                                                                                                                                                                                                                                                                                                             | Hist | HHV-8 Expl                        |
|-------------------------------|----------------------------|-----------------------------------------------|--------|-----|---------------------------------------------------------------------------------------------------------------------------------------------------------------------------------------------------------------------------------------------------------------------------------------------------------------------------------------------------------------|------|-----------------------------------|
| Lee, 1965 <sup>1</sup>        | New York (NY)              | Italian                                       | M      | 8   | Mediastinal LA and mass, SM, growth retardation, fever, anemia (6 g/dL), biological inflammatory syndrome, plasmacytosis on bone marrow aspiration.                                                                                                                                                                                                           | PC   | NR                                |
| Carrington, 1989 <sup>2</sup> | Manchester (UK)            | NR                                            | M      | 16  | Supraclavicular, axillary LA, HSM, AIHA, thrombocytopenia and neutropenia. Recurrence of thrombocytopenia 17 mo later: CT, Danazol, VC were effective, but the patient remained neutropenic.                                                                                                                                                                  | MT   | NR                                |
| Said, 1992 <sup>3</sup>       | Amman (Jordan)             | NR                                            | M      | 14  | Fever, asthenia, generalized LA, HSM, anemia, membranoproliferative glomerulonephritis type 1 leading to a nephrotic state. Treatment with CT.                                                                                                                                                                                                                | PC   | NR                                |
| O'Reilly, 1993 <sup>4</sup>   | Greenville (NC)            | AA                                            | F      | 12  | Fever, mediastinal LA and mass, HSM, anemia, thrombocytopenia, mild hepatic dysfunction, renal insufficiency due to glomerulonephritis. Low IL-6 levels.                                                                                                                                                                                                      | MT   | NR                                |
| Kinney, 1994 <sup>5</sup>     | Nashville (TN)             | AA                                            | M      | 2   | Death from respiratory distress due to the increased mediastinal mass. Fever, inflammatory SD, generalized LA, SM, generalized papular rash, glomerulonephritis (hematuria, pyuria, renal failure), polyarthritides, AIHA, unexplained cerebrovascular stroke (leading to seizure). High IL6 levels in blood and on lymph node biopsy. Treatment with CT, AZA | PC   | NR                                |
| Taylor, 1994 <sup>6</sup>     | Ronde-bosch (South Africa) | Eastern Cape, Ciskei region of South Africa   | M      | 3   | Cervical and hilar LA, HSM, AIHA. Association with KS lesions.                                                                                                                                                                                                                                                                                                | PC   | NR                                |
|                               |                            |                                               | M      | 8   | Generalized LA, HSM; fever, low IGA levels                                                                                                                                                                                                                                                                                                                    | PC   | NR                                |
|                               |                            |                                               | M      | 6   | Cervical and abdominal LA, SM, inflammatory SD. Association with B-cell gastric lymphoma.                                                                                                                                                                                                                                                                     | PC   | NR                                |
|                               |                            |                                               | M      | 5   | Generalized LA, HSM, fever                                                                                                                                                                                                                                                                                                                                    | PC   | NR                                |
|                               |                            |                                               | F      | 11  | Generalized LA, inflammatory SD. Association with KS lesions.                                                                                                                                                                                                                                                                                                 | PC   | NR                                |
| Vergin, 1995 <sup>7</sup>     | Izmir (Turkey)             | NR                                            | M      | 13  | WT syndrome. Three cervical masses, mediastinal LA, HSM, severe AIHA (2 g/dL), high IgG levels. Effective treatment with CT, IgV.                                                                                                                                                                                                                             | HV   | NR                                |
| Smir, 1996 <sup>8</sup>       | Omaha (NE)                 | One of African origin, 1 Hispanic, 6 European | F      | 2   | Rash, generalized LA, HM, repeated infections, growth retardation, anemia, impaired liver function. Treatment with CT, IgV, MTX.                                                                                                                                                                                                                              | PC   | NR                                |
|                               |                            |                                               | F      | 3   | Pneumonia, generalized LA, fever, anemia, thrombocytopenia. Treatment with CT, IFN.                                                                                                                                                                                                                                                                           | PC   | NR                                |
|                               |                            |                                               | F      | 6   | Rash, generalized LA, HM, edema, ascites, effusion AIHA, thrombocytopenia, impaired liver and renal function. Treatment with CT.                                                                                                                                                                                                                              | HV   | PCR HHV-8- on biopsy <sup>c</sup> |
|                               |                            |                                               | F      | 10  | Rash, edema, generalized LA, underweight, HM, AIHA. Treatment with CT.                                                                                                                                                                                                                                                                                        | HV   | NR                                |
|                               |                            |                                               | F      | 12  | Mediastinal mass, ascites, effusion, generalized LA, HM, anemia, thrombocytopenia, GN (proteinuria), impaired liver and renal function. Death shortly after surgery.                                                                                                                                                                                          | PC   | PCR HHV-8- on biopsy <sup>c</sup> |
|                               |                            |                                               | M      | 15  | Axillary and cervical LA, HM, gingivitis, sinusitis, AIHA, thrombocytopenia, neutropenia. Treatment with IgV.                                                                                                                                                                                                                                                 | PC   | PCR HHV-8- on biopsy <sup>c</sup> |
|                               |                            |                                               | F      | 16  | Retropitoneal LA, arthralgia, cutaneous nodules, hydronephrosis, edema, anemia, thrombocytopenia. Treatment with CT and by splenectomy.                                                                                                                                                                                                                       | PC   | PCR HHV-8- on biopsy <sup>c</sup> |
|                               |                            |                                               | M      | 17  | Rash, edema, ascites, generalized LA, HM, AIHA, thrombocytopenia, MPGN (proteinuria, hematuria), impaired renal and liver function. Treatment with CT and by plasmapheresis.                                                                                                                                                                                  | HV   | NR                                |

| Article                              | Author Location       | Patient Origin <sup>a</sup> | Gender | Age | Clinical Features                                                                                                                                                                                                                                                                                                     | Hist            | HHV-8 Expl                                         |
|--------------------------------------|-----------------------|-----------------------------|--------|-----|-----------------------------------------------------------------------------------------------------------------------------------------------------------------------------------------------------------------------------------------------------------------------------------------------------------------------|-----------------|----------------------------------------------------|
| Arslian, 1996 <sup>9</sup>           | Kaysen (Turkey)       | NR                          | M      | 8   | Rash, mesenteric and mediastinal LA, HSM, bilateral uveitis, hepatitis, nephrotic syndrome (proteinuria), biological inflammatory syndrome, seizures (normal cerebral CT-scan). Course with multiples relapses.                                                                                                       | HV              | NR                                                 |
| Nakamura, 1997 <sup>10</sup>         | Shiga (Japan)         | NR                          | M      | 12  | Generalized peripheral LA, mediastinal LA, interstitial pneumonia, anemia, thrombocytopenia, proteinuria, high blood IgG and IgM levels.                                                                                                                                                                              | PC              | NR                                                 |
| Akyuz, 2000 <sup>11</sup>            | Ankara (Turkey)       | NR                          | F      | 10  | Effective treatment with CT and immunosuppressive drugs. Bilateral cervical masses then generalized LA, HSM benign course for 3 y then T-cell lymphoma (stage IV). Death after respiratory distress during lymphoma treatment, after 5 y of MCD.                                                                      | NR <sup>b</sup> | NR                                                 |
| Kosucu, 2003 <sup>12</sup>           | Trabzon (Turkey)      | NR                          | M      | 5   | Wt loss, growth retardation, axillary, supraclavicular LA, multiple subpectoral masses, HSM. Treatment by surgery and radiation therapy.                                                                                                                                                                              | HV              | NR                                                 |
| Baserga, 2005 <sup>13</sup>          | Orange (CA, US)       | Hispanic origin             | F      | 4   | Fever, generalized LA, HM, diarrhea, vomiting, ascites and hypertension related to renal failure (dialysis), anemia, thrombocytopenia. Treatment with chemotherapy (CT, DX, VC, Cyp), and IgIV. Free of disease 36 mo after treatment.                                                                                | MT              | HHV-8 – on biopsy <sup>d</sup> /blood <sup>d</sup> |
| Zakiullah, 2006 <sup>14</sup>        | Karachi (Pakistan)    | NR                          | M      | 16  | Abdominal pain, malaise, wt loss, cervical and abdominal LA, hepatic mass, HSM, anemia. Courses of chemotherapy (CT, Cyp).                                                                                                                                                                                            | HV              | NR                                                 |
| Robinson, 2006 <sup>15</sup>         | Melbourne (Australia) | NR                          | F      | 18  | Inguinal, axillary and mediastinal LA (few clinical details available)                                                                                                                                                                                                                                                | PC              | NR                                                 |
| Vasudev Rao, 2007 <sup>16</sup>      | Muscat (Oman)         | Oman                        | M      | 18  | Fever, loss of wt and appetite. Generalized LA, thoracoabdominal LA, HSM, weakness of both legs due to cerebral lesions. Anemia, biological inflammatory syndrome (high IgM level). Treatment with multiple courses of chemotherapy, achieving remission. Then AIHA treated with CT. Free of disease since treatment. | MT              | NR                                                 |
| Sharma, 2007 <sup>17</sup>           | New Delhi (India)     | NR                          | M      | 6   | Fever, generalized LA, mesenteric and mediastinal LA, HM, bilateral pleura effusion, anemia, biological inflammatory syndrome, high IgG level, biological hepatitis. Treatment with CT, free of disease (44 mo of FU).                                                                                                | HV              | NR                                                 |
| Lee, 2008 <sup>18</sup>              | Seoul (South Korea)   | NR                          | F      | 14  | Cervical, axillary and mesenteric LA, discrete generalized LA, HSM, anemia, thrombocytopenia. Treatment with multiple courses of CT, with a transient effect on thrombopenia, then with 5 CHOP cycles, achieving remission.                                                                                           | MT              | NR                                                 |
| Galeotti, 2008 <sup>19</sup>         | Bicetre (France)      | Hispanic origin             | M      | 6.5 | Multicentric Castleman disease.                                                                                                                                                                                                                                                                                       | HV              | HHV-8- on biopsy <sup>e</sup>                      |
| Sobrevilla-Calvo, 2009 <sup>20</sup> | Mexico City (Mexico)  | NR                          | M      | 15  | Fever, chills, polyarthralgia. Then multiple episodes of unexplained fever; HSM, mesenteric and retroperitoneal LA, infiltrative mass located between the pancreas and splenic hilum. Six courses of chemotherapy (Cyp, VB, rituximab) then IL-1RA agonist, CT and colchicine resulting in persistent remission.      | MT              | HHV-8 serology <sup>f</sup>                        |

AA, African American; AIHA, autoimmune hemolytic anemia; AZA, azathioprine; CHOP, combined chemotherapy with prednisone, vincristine, cyclophosphamide and doxorubicin; Cyp, cyclophosphamide; CT, corticosteroids; DX, doxorubicin; Expl, explorations; F, female; FU, follow-up; GN, glomerulonephritis; HHV-8, human herpes virus 8; HIST, histology; HM, hepatomegaly; HSM, hepatosplenomegaly; HV, hyaline vascular type; IFN, interferon; Ig, immunoglobulin; IgIV, intravenous immunoglobulin; IL, interleukin; KS, Kaposi sarcoma; LA, lymphadenopathy; M, male; MPGN, membranoproliferative glomerulonephritis; MT, mixed type; MTX, methotrexate; NR, not reported; PC, plasma-cell type; SM, splenomegaly; VB, vincristine; VC, vincristine; Wt syndrome, autosomal dominant condition, combining hematologic abnormalities (anemia, pancytopenia, leukemia, lymphoma) with mild limb defects (ulnar and radial defects, bifid or hypoplastic thumbs and cutaneous syndactyly).

<sup>a</sup> Consanguinity was explicitly investigated (questioning of parents and other tests) and reported. In such cases, this finding is also indicated in the clinical features cell.

<sup>b</sup> The histologic pattern of the lymph node was typical of giant node hyperplasia, but the histologic type was not specified.

<sup>c</sup> PCR analysis to detect the presence of HHV-8 in biopsy specimens.

<sup>d</sup> HHV-8 serology (no other details given), testing for HHV-8 based on the immunoperoxidase staining of paraffin-embedded biopsy tissue.

<sup>e</sup> Immunohistochemical study carried out on biopsy specimens with antibodies directed against HHV-8 LANA.

<sup>f</sup> No details provided concerning the technique used for HHV-8 serology.

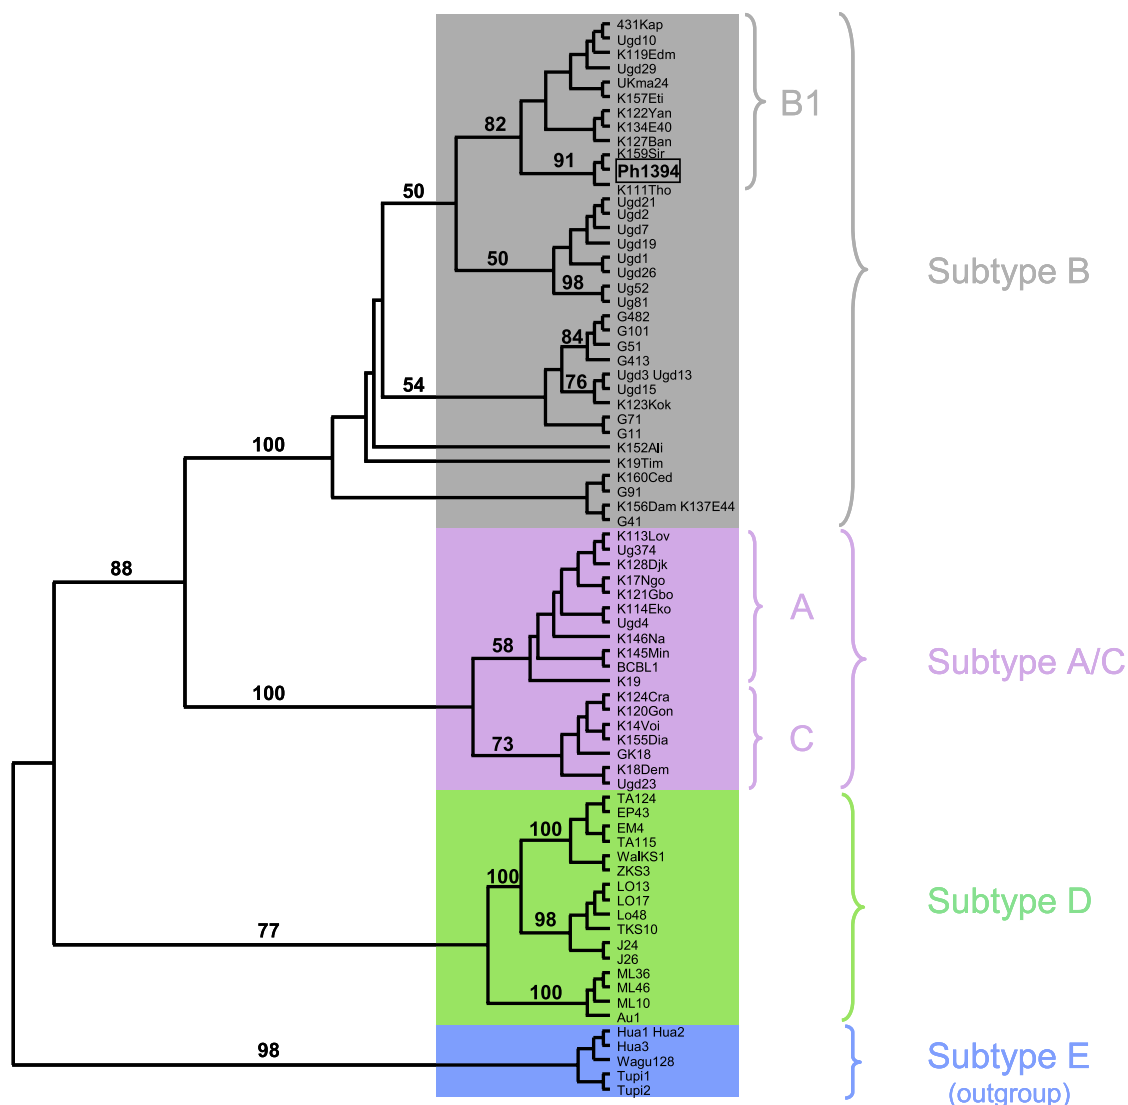

**SUPPLEMENTAL FIGURE 2**

Phylogenetic tree constructed by the neighbor-joining method in PAUP (v4.0b10), based on a 624-bp fragment of the K1 ORF for the 77 available human herpes virus 8 (HHV-8) sequences, including the sequence generated in this work (in bold type). The DAMBE program (version 4.2.13) was used to align the HHV-8 sequences. The final alignment was input into the Model test program (version 3.6) to select the best model, according to the Akaike information criterion for phylogenetic analyses. The selected model was the Kimura 3-parameter model. Bootstrap values were calculated for 1000 replicates and the numbers at some nodes of the tree (bootstrap values) indicate frequencies of occurrence for 100 trees. A through E correspond to the 5 HHV-8 subtypes and B1 to a group within the sub-Saharan African B subtype, described by the following references in the main text of this article: Lacoste et al 2000,<sup>8</sup> White et al 2008,<sup>9</sup> and Kajumbula et al 2006.<sup>10</sup>

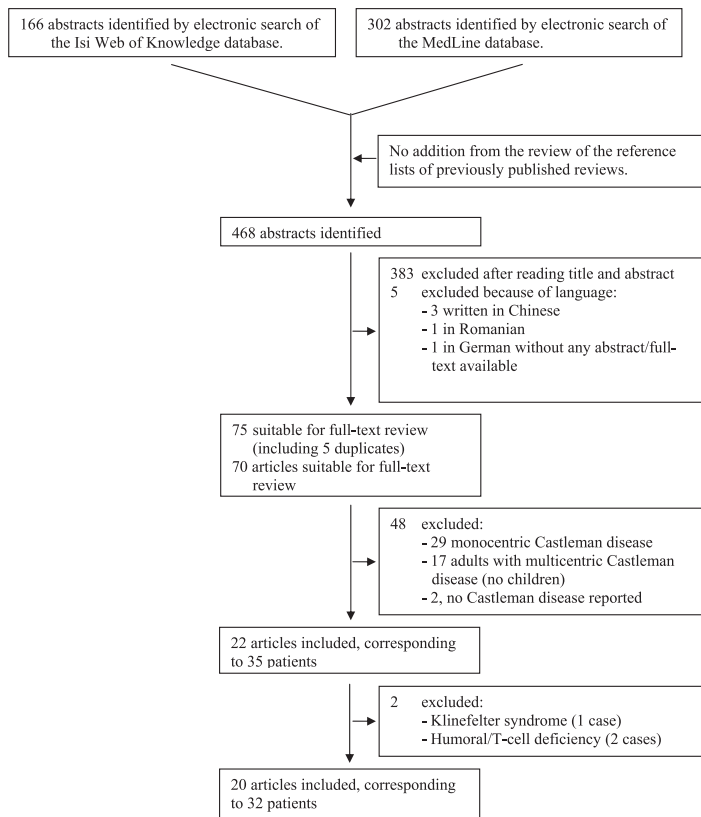

**SUPPLEMENTAL FIGURE 3**

Flowchart for the systematic literature review
